# Supplementary material for: Comparative Analysis of Chloroplast psbD Promoters in Terrestrial Plants
Source: PubMed Central journal article supplement (PMC5508017; doi:10.3389/fpls.2017.01186), 2017-07-13

sFig. 2

**A** *Equisetum hyemale*  
(monilophyte)

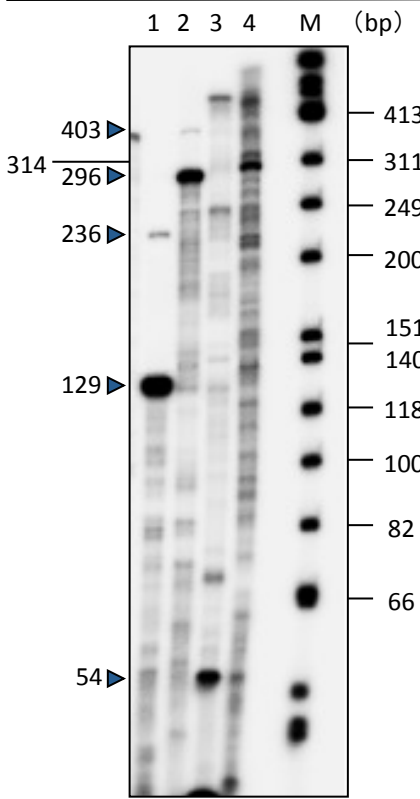

**B** *Pinus thunbergii*  
(gymnosperm)

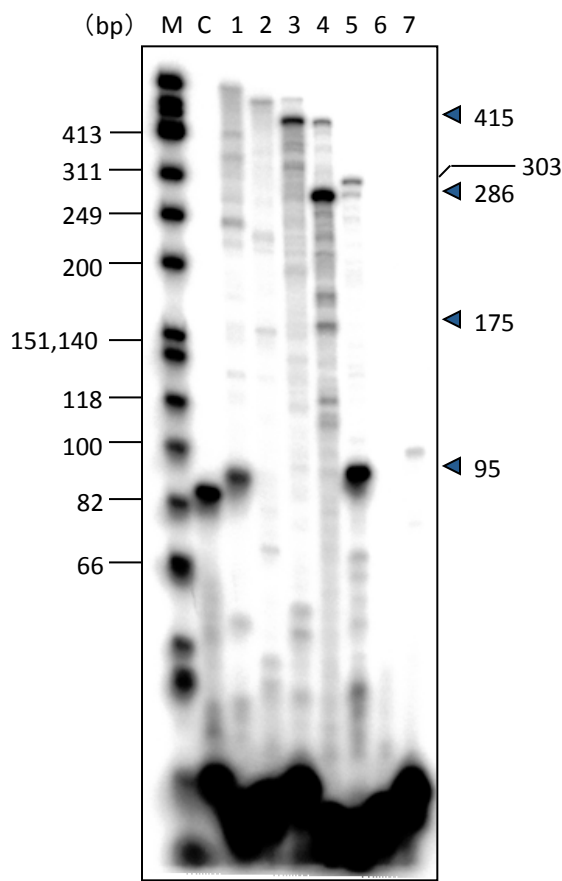

**C** *Laurus nobilis*  
(angiosperm)

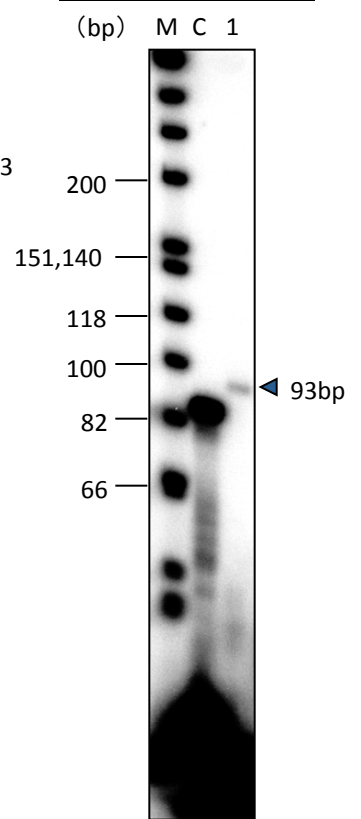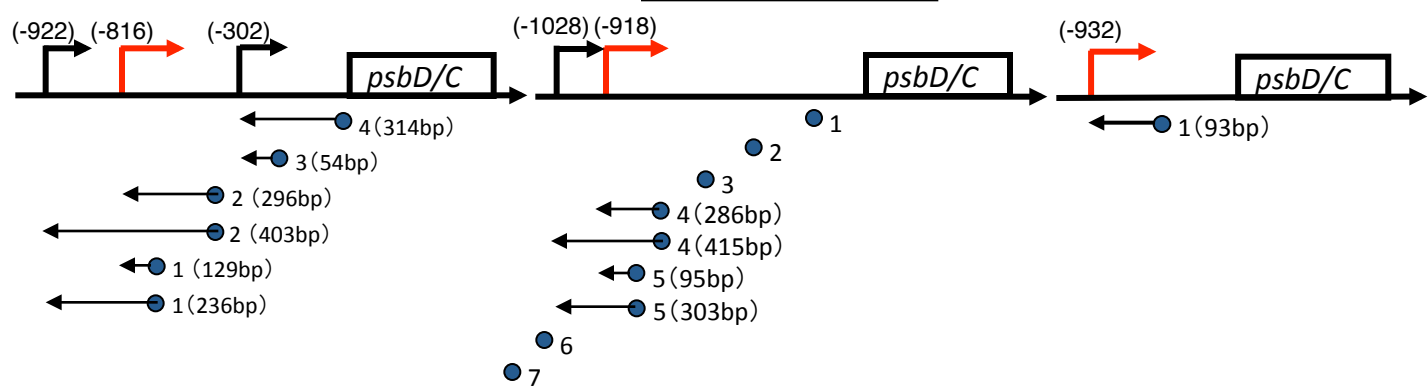

Supplement: Image_2.pdf [file Image_2.pdf]
