# Supplementary material for: Comparative Analysis of Chloroplast psbD Promoters in Terrestrial Plants
Source: PubMed Central journal article supplement (PMC5508017; doi:10.3389/fpls.2017.01186), 2017-07-13

sFig. 4

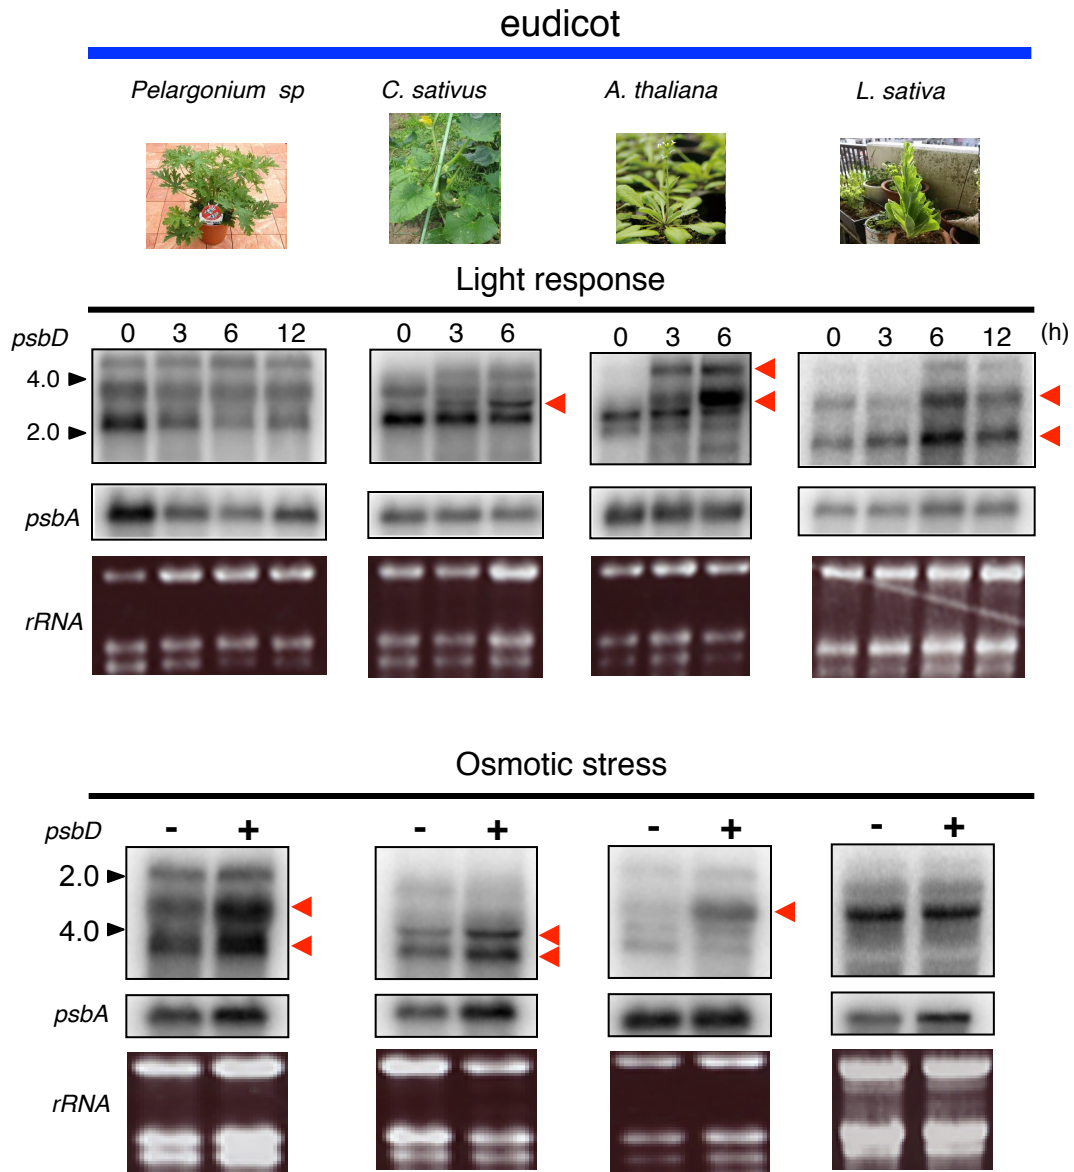

Supplement: Image_4.pdf [file Image_4.pdf]
