# Supplementary material for: Comparative Analysis of Chloroplast psbD Promoters in Terrestrial Plants
Source: PubMed Central journal article supplement (PMC5508017; doi:10.3389/fpls.2017.01186), 2017-07-13

sFig. 1

**A** *Marchantia polymorpha*  
(liverwort)

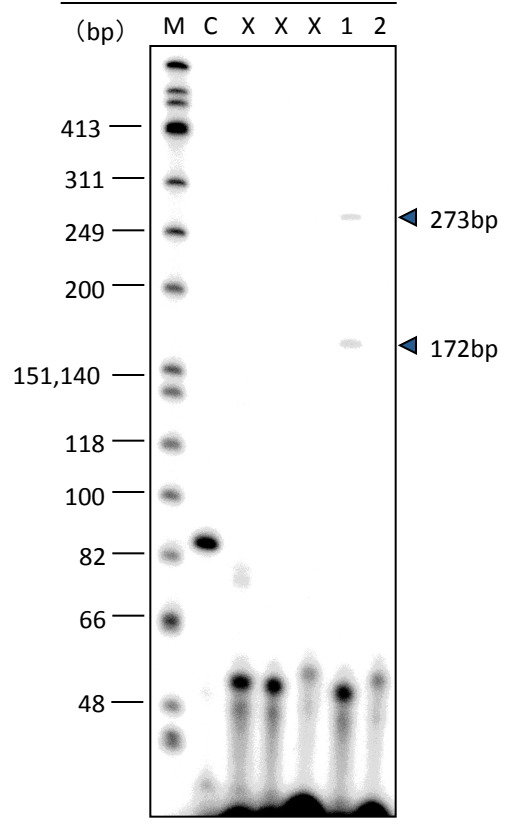

**B** *Huperzia lucidula*  
(lycophyte)

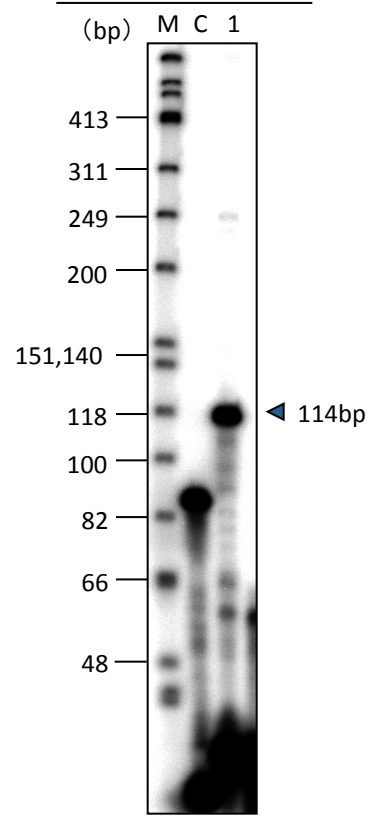

**C** *Psilotum nudum*  
(monilophyte)

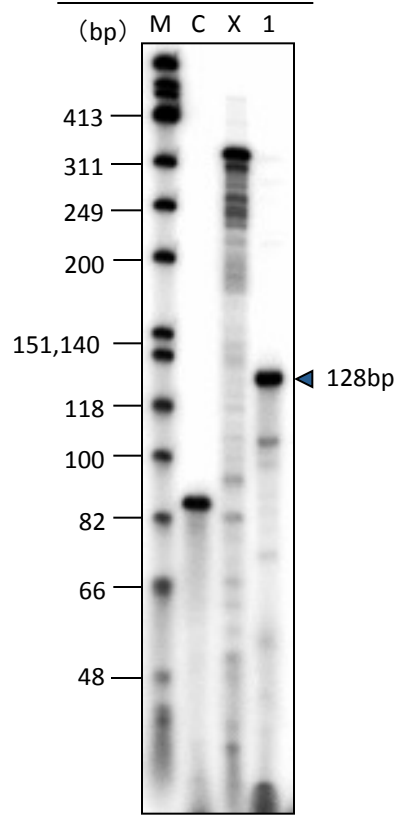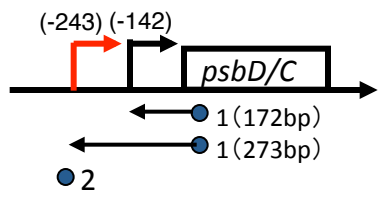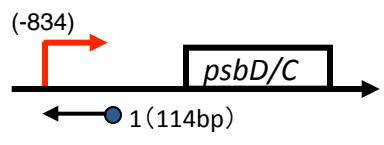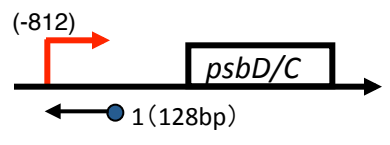

Supplement: Presentation_1.pdf [file Presentation_1.pdf]
