# Supplementary material for: Comparative Analysis of Chloroplast psbD Promoters in Terrestrial Plants
Source: PubMed Central journal article supplement (PMC5508017; doi:10.3389/fpls.2017.01186), 2017-07-13

sFig. 8

monilophyte

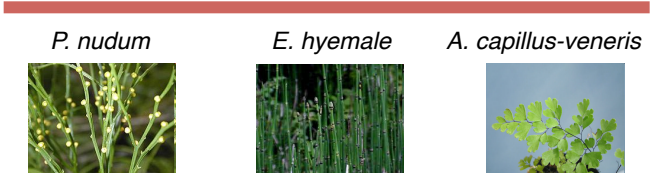

Light response

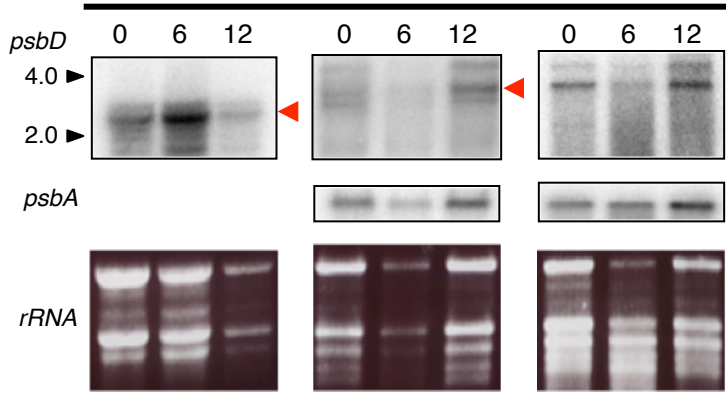

Osmotic stress

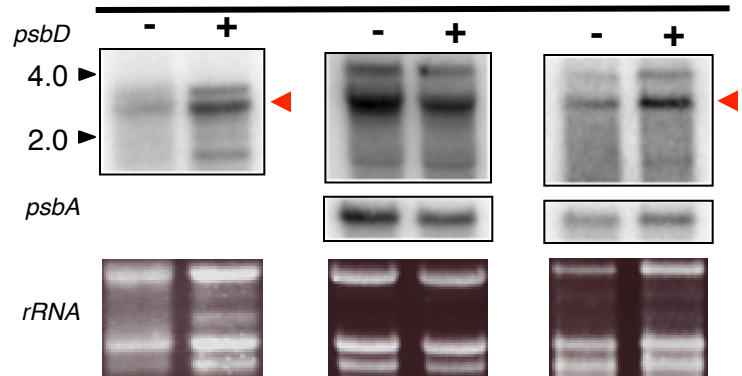

Supplement: Presentation_8.pdf [file Presentation_8.pdf]
