# Supplementary material for: Comparative Analysis of Chloroplast psbD Promoters in Terrestrial Plants
Source: Front Plant Sci. 2017 Jul 13;8:1186. doi: 10.3389/fpls.2017.01186 (PMC5508017; doi:10.3389/fpls.2017.01186)
Supplement: Supplementary file 10 [file Image_10.pdf]

psbA promoter

|                            |                                                              |
|----------------------------|--------------------------------------------------------------|
| <i>T. aestivum</i>         | TTGGTTGACATTGGTATATAGTCTATGTTATACTGTTAA                      |
| <i>O. sativa</i>           | TTGGTTGACATTGGTATATAGTCTATATTATACTGTTAA                      |
| <i>A. thaliana</i>         | TTGGTTGACATGGCTATATAAGTCATGTTATACTGTTTC                      |
| <i>N. tabacum</i>          | TTGGTTGACACGAGTATATAAGTCATGTTATACTGTTGA                      |
| <i>N. alba</i>             | TTAGTTGACACGGGCATATAAGGCATGTTATACTGTTGA                      |
| <i>A. trichopoda</i>       | TTGGTTGACACAGGCATATAGGTCATGTTATACTGTTGA                      |
| <i>P. thunbergii</i>       | TTGGTTGACATTGATACATGGATCATATTATACTGTAAA                      |
| <i>C. taitungensis</i>     | TCGATTTCACGATA-TATATAAGTCATACATACTGTTAA                      |
| <i>W. mirabilis</i>        | ATAGTTGACTTTAATAAACCATTTCTGTTATACTGTTAA                      |
| <i>A. eveceta</i>          | TAAGTTGACATCAATAGATAAGTTGTGTTATACTATGAA                      |
| <i>A. capillus-veneris</i> | TTGGTTGACACGGATAGGTTT-TGTGATATGCTACATA                       |
| <i>P. nudum</i>            | TAAGTTGACATATATGGAAGATCATGTTATACTTCAAA                       |
| <i>H. lucidula</i>         | TGGGTTGACACAAAAAGAAAGATTGTGTAATATTATGGA                      |
| <i>P. patens</i>           | TCAGTTGACATAATAATACATTTTGTGTAATACTATAAA                      |
| <i>M. polymorpha</i>       | TTAGTTGACATAATCATATGTTATGTGTAATACTATAAG                      |
| <i>C. vulgaris</i>         | CTAGTTGACATTTTTATACCTTACATACATAATATCTA                       |
|                            | -35                      TATA                      -10       |
|                            | TTGACA                      TATA                      TATACT |

rbcL promoter

|                            |                                         |
|----------------------------|-----------------------------------------|
| <i>T. aestivum</i>         | TGGGTTGCGCTATATCTATCAAAGAGTATACAATAATTA |
| <i>O. sativa</i>           | GGGGTTGCGCTATATCTATTAAAGAGTATACAATAAAGA |
| <i>A. thaliana</i>         | TAGGTTGCGCTATACATATGAAAGAATATACAATAATGA |
| <i>N. tabacum</i>          | TGGGTTGCGCTATATATATGAAAGAGTATACAATAATGA |
| <i>N. alba</i>             | TGGGTTGCGCCATACATATGAAACAGTATACAATAATGA |
| <i>A. trichopoda</i>       | TGGGTTGCGCCATACATATGAAACAGTATACAATAATGA |
| <i>P. thunbergii</i>       | TGGGTTGCGTCATACATAAAGAACACTATACAATGAGAG |
| <i>C. taitungensis</i>     | AGGGTTGCGCCATACATAAAGAACATTATACAATAATAG |
| <i>W. mirabilis</i>        | TGGGTTGCATTATATGGAAAAACAATCTAAATGATAG   |
| <i>A. eveceta</i>          | TGGGTTGCATTATACAGAAAATAATTTATAGAATACTAG |
| <i>A. capillus-veneris</i> | TTAGTTGCACCCCGCATCGGACGCGGTATAAATAATAA  |
| <i>P. nudum</i>            | TGGGTTGCATCATATAGCAACTGCAATATAAATAATAG  |
| <i>H. lucidula</i>         | TGGGTTGCATCACGTATCAAAGCAATATACAATGATAA  |
| <i>P. patens</i>           | TGAGTTGCATCAAATGTAGAAAATAATATACAATAATAC |
| <i>M. polymorpha</i>       | TAGGTTGCATTACATATAAAAAACAATATACAATAATAA |
| <i>C. vulgaris</i>         | TTAGTTGCGTCATCTATTCAAGAATGTGTATAATACAAT |
|                            | -35                      -10            |
|                            | TTGCGC                      TACAAT      |
